# Supplementary material
Source: PubMed Central journal article supplement (PMC2903418)
Supplement: supp_M109.100131_Suppletable-revised.pdf [file supp_M109.100131_Suppletable-revised.pdf]

1 Supplemental table S1. Bacterial strains and plasmids used in this study.

| 2  |                                             | Description                                                      | Antibiotics* | Reference  |
|----|---------------------------------------------|------------------------------------------------------------------|--------------|------------|
| 3  | <b>GAS strains</b>                          |                                                                  |              |            |
| 4  | JRS4                                        | M6 strain.                                                       | Sm           | 26         |
| 5  | JRS4 $\Delta$ slo                           | SLO-defective mutant of JRS4.                                    | Sm, Km       | This study |
| 6  | JRS4 $\Delta$ slo-comp                      | JRS4 $\Delta$ slo with an IPTG-inducible SLO-expressing-plasmid. | Sm, Km, Tet  | This study |
| 7  |                                             |                                                                  |              |            |
| 8  | <b><i>E. coli</i></b>                       |                                                                  |              |            |
| 9  | DH10B                                       | Plasmid construction and propagation.                            | -            | Invitrogen |
| 10 |                                             |                                                                  |              |            |
| 11 | <b>Plasmids</b>                             |                                                                  |              |            |
| 12 | pSF151                                      | Shuttle vector for the construction of GAS mutant strains.       | Km           | 27         |
| 13 | pSF151-fSLO                                 | pSF151 harboring an internal fragment of <i>slo</i> gene.        | Km           | This study |
| 14 | pENTR-SD-TOPO                               | Cloning vector adapted for Gateway system.                       | Km           | Invitrogen |
| 15 | pOGW                                        | IPTG inducible vector for protein expression.                    | Tet          | 29         |
| 16 | pOGW-SLO                                    | pOGW harboring intact <i>slo</i> gene.                           | Tet          | This study |
| 17 | pEGFP-LC3                                   | Expression plasmid for EGFP-fused LC3.                           | Km           | 30         |
| 18 | pmCherry-1                                  | Vector for the expression of mCherry-fused protein.              | Km           | Clontech   |
| 19 | pmCherry-LC3                                | Expression plasmid for mCherry-fused LC3.                        | Km           | This study |
| 20 | pENTR11                                     | Cloning vector adapted for Gateway system.                       | Km           | Invitrogen |
| 21 | pENTR-EGFP-LC3                              | pENTR11 harboring EGFP-fused LC3 expressing gene.                | Km           | This study |
| 22 | pKF19K                                      | Vector used for the induction of mutation.                       | Km           | Takara     |
| 23 | pcDNA3.1 Zeo(+)                             | Vector for protein expression.                                   | Amp          | Invitrogen |
| 24 | pcDNA3.1 Zeo(+)-<br>EGFP-Rab5               | Expression plasmids for EGFP-fused Rab5.                         | Amp          | This study |
| 25 |                                             |                                                                  |              |            |
| 26 | pcDNA3.1 Zeo(+)-<br>EGFP-Rab5Q79H, Rab5S34N | Expression plasmids for EGFP-fused mutant Rab5.                  | Amp          | This study |
| 27 |                                             |                                                                  |              |            |
| 28 | pcDNA3.1 Zeo(+)-<br>EGFP-Rab7               | Expression plasmids for EGFP-fused Rab7.                         | Amp          | This study |
| 29 |                                             |                                                                  |              |            |
| 30 | pcDNA3.1 Zeo(+)-<br>EGFP-Rab7Q67L, Rab7T22N | Expression plasmids for EGFP-fused mutant Rab7.                  | Amp          | This study |
| 31 |                                             |                                                                  |              |            |
| 32 | pAd/CMV/V5-DEST                             | Plasmid for protein-expressing adenovirus.                       | Amp          | Invitrogen |
| 33 |                                             |                                                                  |              |            |

1 Supplemental table S1, continued.

| 2  |                    | Description                                                    | Antibiotics* | Reference  |
|----|--------------------|----------------------------------------------------------------|--------------|------------|
| 3  | pAd-EGFP-          | Plasmid for the production of Rab5 protein-expressing-         | Amp          | This study |
| 4  | Rab5               | adenovirus.                                                    |              |            |
| 5  | pAd-EGFP-          | Plasmids for the production of mutant Rab5 protein-expressing- | Amp          | This study |
| 6  | Rab5Q79H, Rab5S34N | adenovirus.                                                    |              |            |
| 7  | pAd-EGFP-          | Plasmid for the production of Rab7 protein-expressing-         | Amp          | This study |
| 8  | Rab7               | adenovirus.                                                    |              |            |
| 9  | pAd-EGFP-          | Plasmids for the production of mutant Rab7 protein-expressing- | Amp          | This study |
| 10 | Rab7Q67L, Rab7T22N | adenovirus.                                                    |              |            |

11 \*Antibiotics; Resistance to antibiotics.

12 Abbreviations: Sm, Streptomycin; Amp, ampicillin; Km, Kanamycin; Tet, Tetracycline.

1 Supplemental table S2. Sequences of synthetic oligonucleotides used for PCR and mutagenesis.

| 2  | Target gene or purpose         | Primer sequence                               |
|----|--------------------------------|-----------------------------------------------|
| 3  | <i>slo</i> , internal fragment | 5'- <u>GAGAA</u> TTTCGAGCGAAGAAGATCACACTGAAGA |
| 4  |                                | 5'- <u>GAGGAT</u> CCGCTTGTATGCTGCAATCATCACCT  |
| 5  | Rab5                           | 5'-CACCATGGCTAGTCGAGGCGCAACAAGA               |
| 6  |                                | 5'-TTAGTTACTACAACACTGATTCCTGGTT               |
| 7  | Rab7                           | 5'-CACCATGACCTCTAGGAAGAAAGTGTTG               |
| 8  |                                | 5'-TCAGCAACTGCAGCTTCTGCCGAGGCC                |
| 9  | Intact <i>slo</i>              | 5'-CACCCACCATGAAGGACATGTCTAATAAAAAAACATTT     |
| 10 |                                | 5'-CTACTTATAAGTAATCGAACCATATGGGCT             |
| 11 | Rab5Q67L                       | 5'- GCTGGT <u>CT</u> AGAACGATACCATAGCCTA      |
| 12 |                                | 5'- TCGTT <u>CT</u> AGACCAGCTGTATCCCATAT '    |
| 13 | Rab5S34N                       | 5'- GGCAAAA <u>AT</u> AGCCTAGTGCTTCGTTTT      |
| 14 |                                | 5'- TAGGCT <u>AT</u> TTTTTGCCAACAGCGGACTC     |
| 15 | Rab7Q67L                       | 5'- GCAGG <u>ACT</u> CGAACGGTTCAGTCTCTC       |
| 16 |                                | 5'- CCGTTC <u>GAG</u> TCCTGCTGTGTCCCATAT      |
| 17 | Rab7T22N                       | 5'- GGGAAG <u>AAT</u> TCACTCATGAACCAGTAT      |
| 19 |                                | 5'- AGTGA <u>ATT</u> CTTCCCGACTCCAGAATC       |

20 Underlines show restriction enzyme sites or mutagenesis sites.
