# Supplementary material
Source: PubMed Central journal article supplement (PMC2903418)

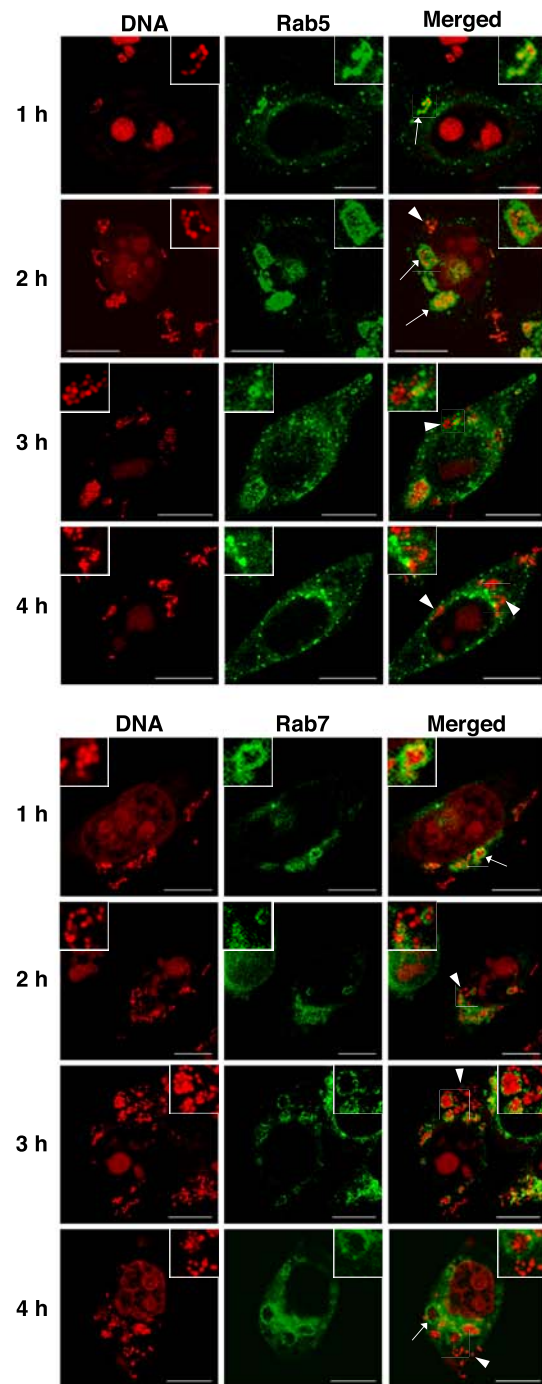

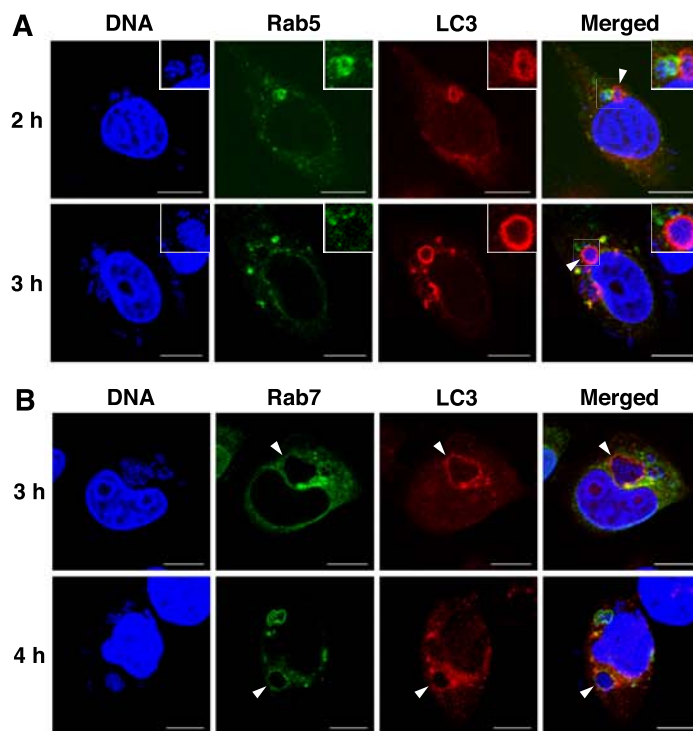

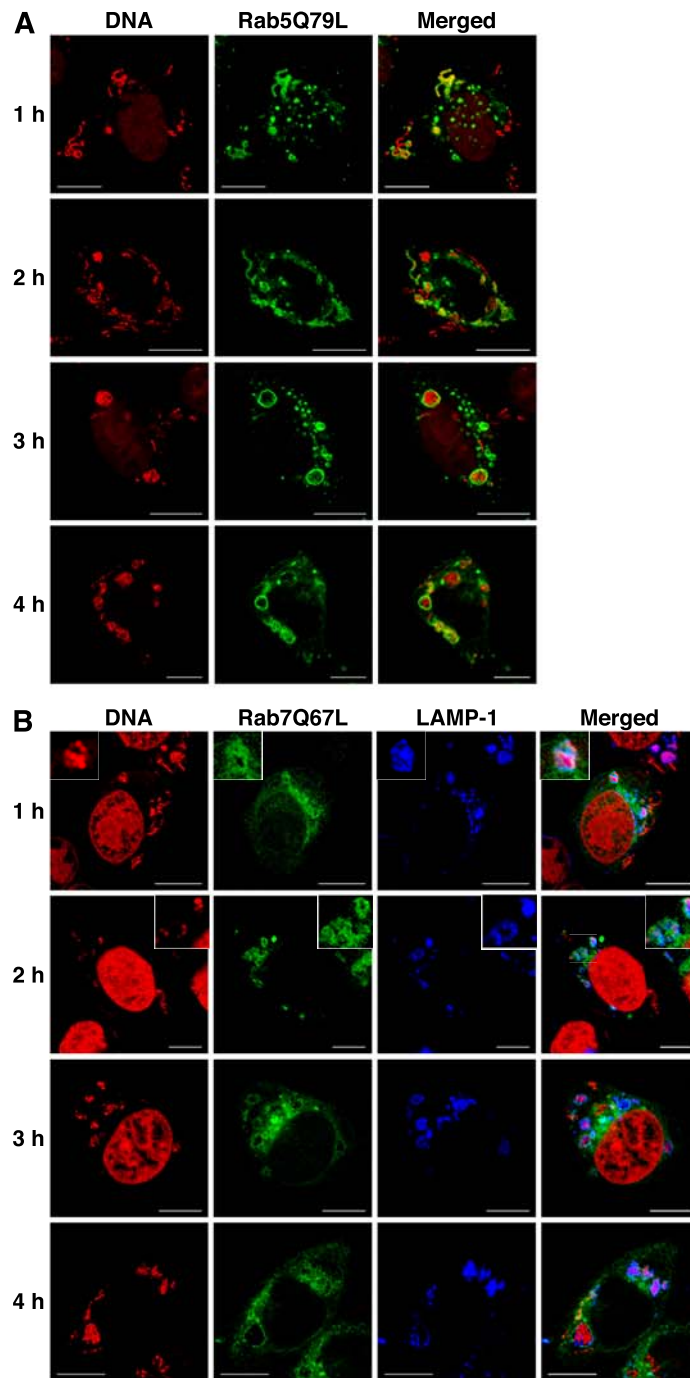

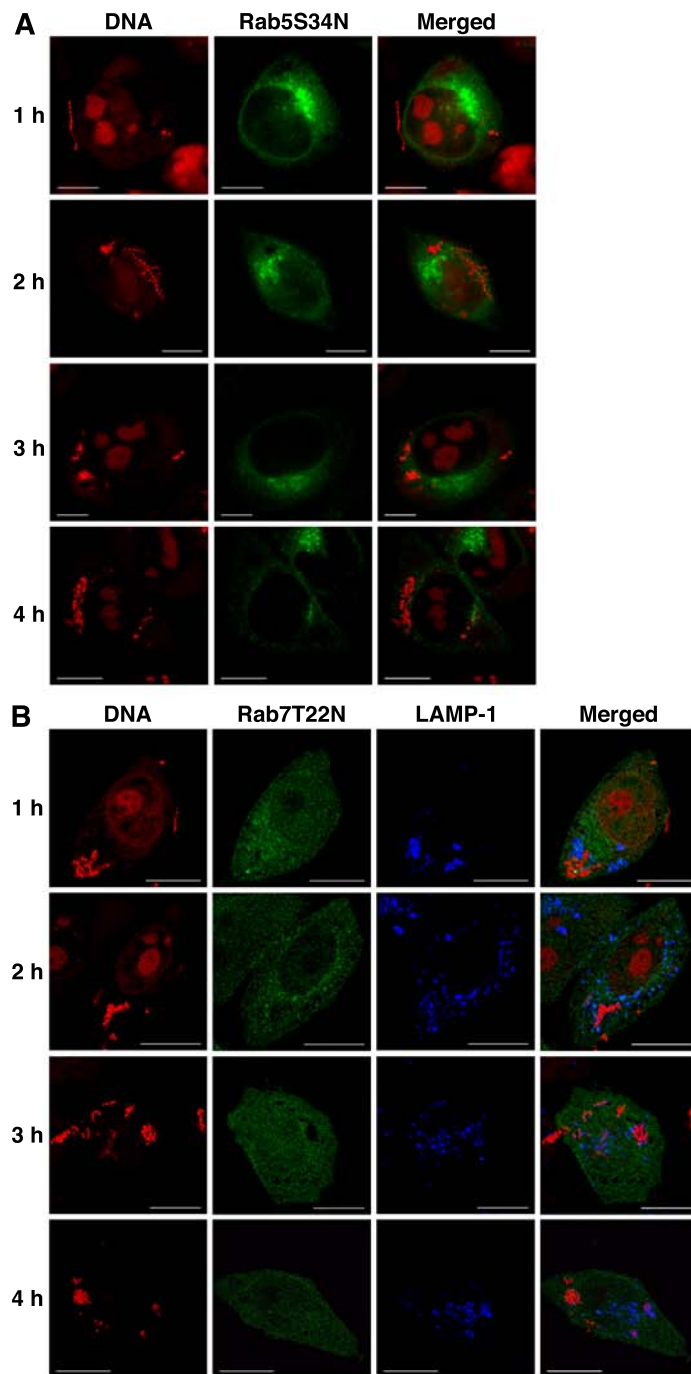

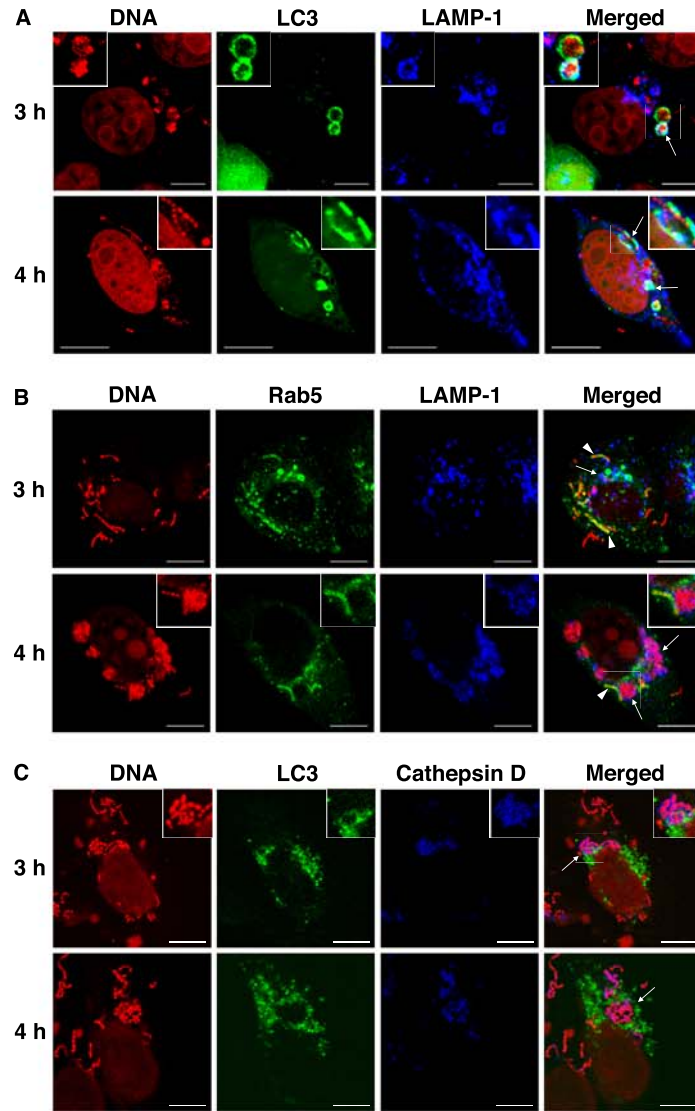

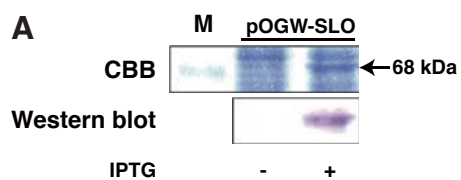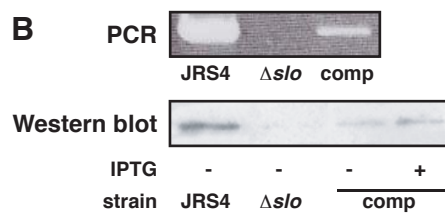

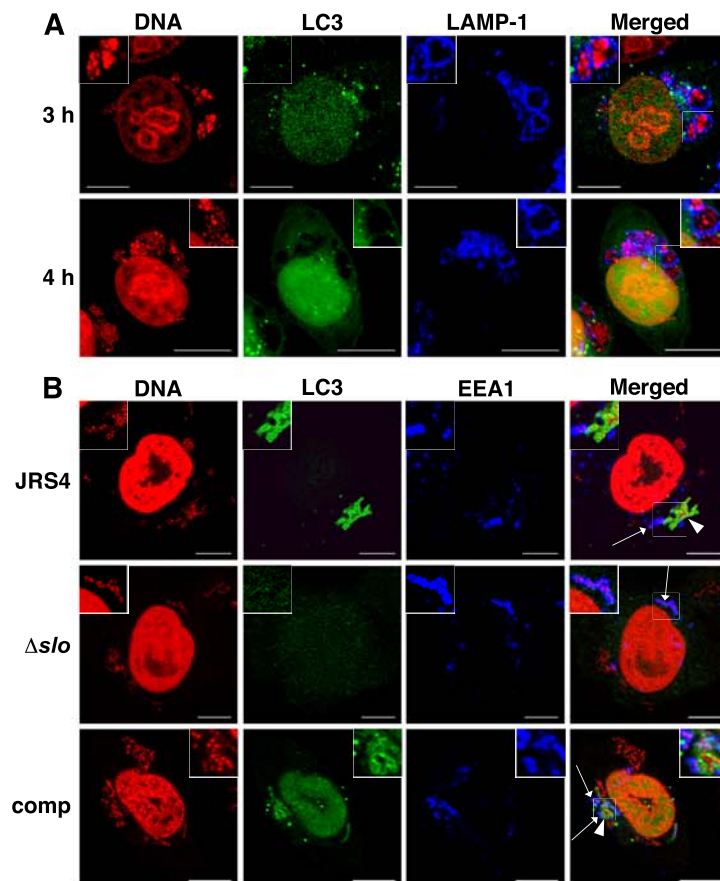

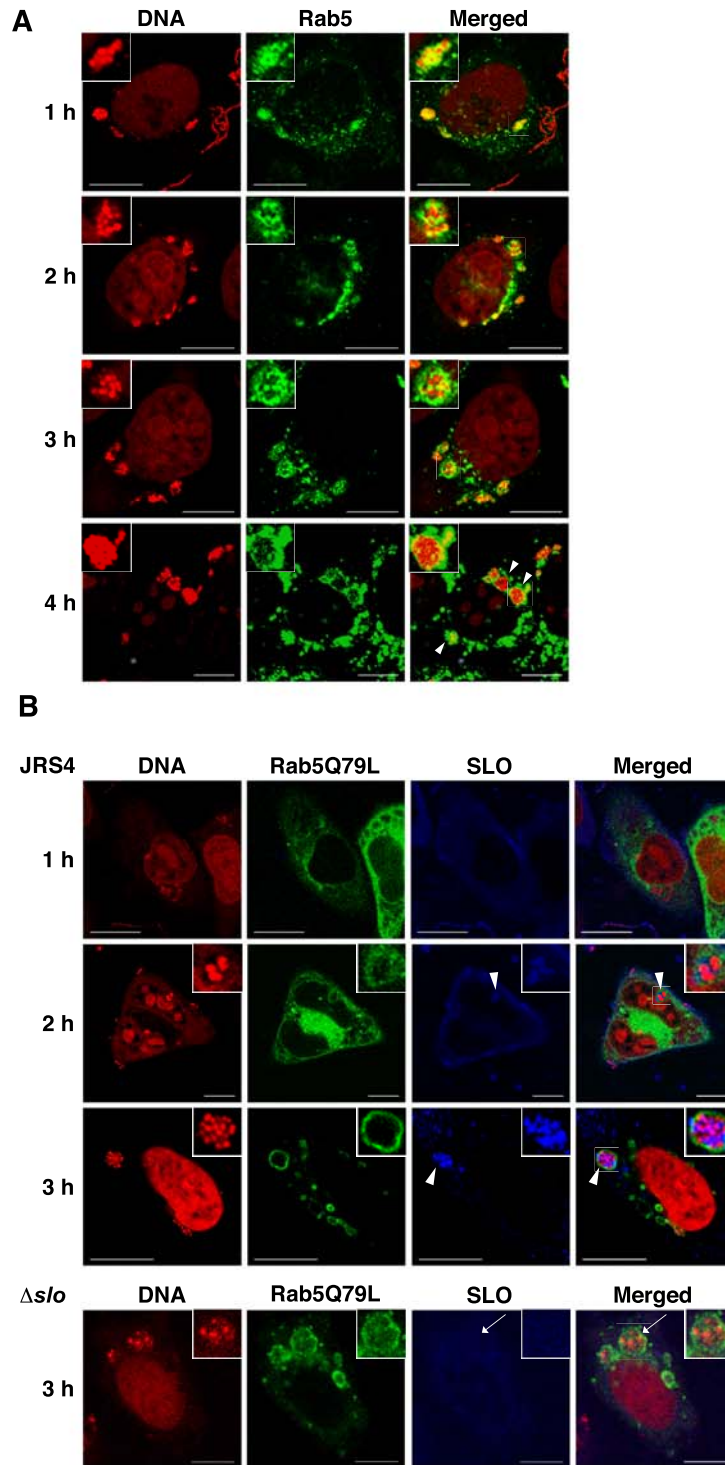



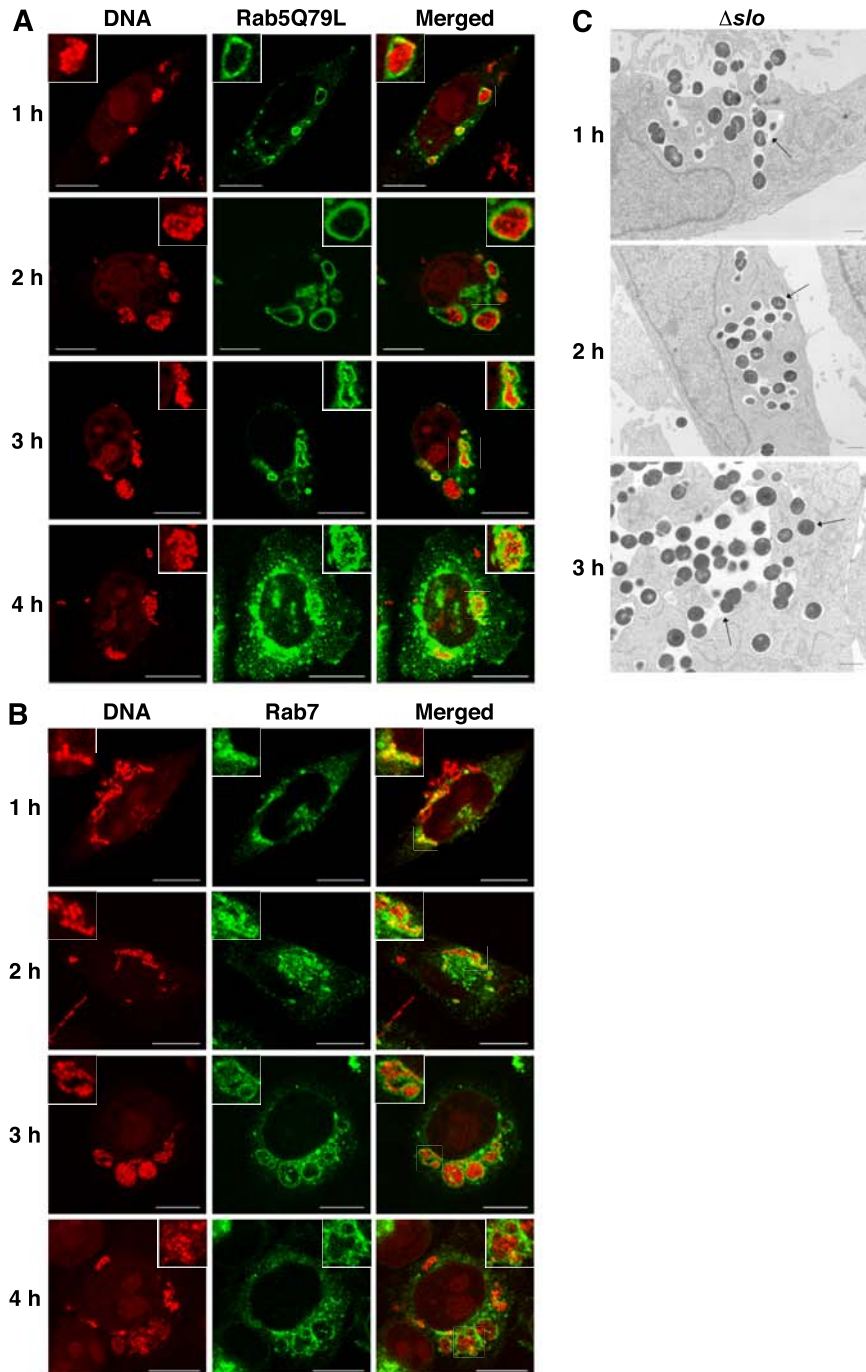

Supplement: supp_M109.100131_jbc.M109.100131-1.pdf [file supp_M109.100131_jbc.M109.100131-1.pdf]
